# Supplementary material for: ONC201 exerts oncogenic effects beyond its mitochondria-disturbing role in neuroblastoma subsets
Source: Springer Nature journal article supplement (doi:10.1007/s00109-025-02541-0), 2025-04-10

(Fig.4) Supplement data  
C-myc and Actin

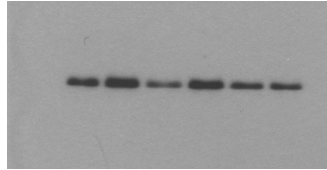

(Fig.5) Supplement data  
ATRX and Actin

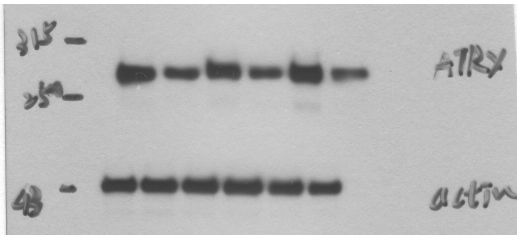

(Fig.4) Supplement data  
LGR5 and Actin

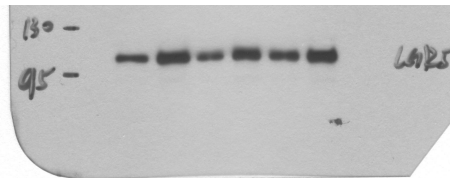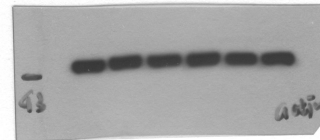

Supplement: MOESM1 [file 109_2025_2541_MOESM1_ESM.pdf]
